# Supplementary material
Source: PubMed Central journal article supplement (PMC3147068)
Supplement: supp_dyq259_supplementary.pdf [file supp_dyq259_supplementary.pdf]

Supplemental Figure 1: Summary risk estimates for lung cancer risk associated with household coal use for heating and cooking among nonsmoking females\*.

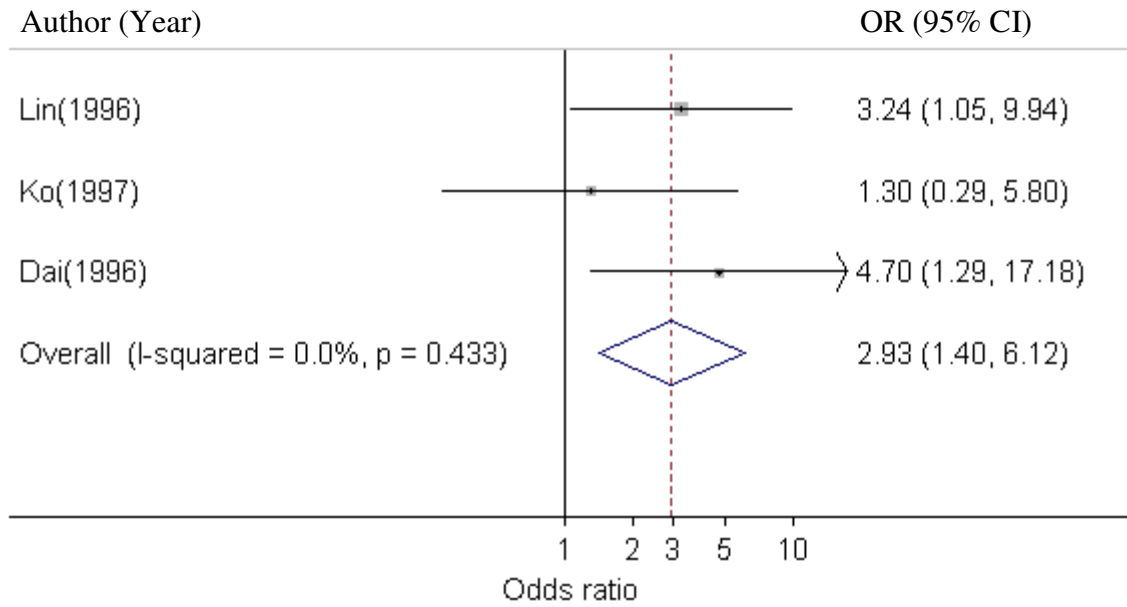

\*Square symbols represent each study's published adjusted odds ratios, with the size proportional to the number of cases and horizontal lines representing the 95% confidence intervals; Summary odds ratios and 95% confidence intervals were calculated using random effects models.
